# Supplementary material for: Self-biased wavelength selective photodetection in an n-IGZO/p-GeSe heterostructure by polarity flipping
Source: Royal Society of Chemistry journal article supplement (doi:10.1039/d2nr01013e), 2022-01-01
Supplement: d2nr01013e1.pdf [file d2nr01013e1.pdf]

## Self-biased wavelength selective photodetection in an n-IGZO/p-GeSe heterostructure by polarity flipping.

Muhammad Hussain<sup>a,b</sup>, Asif Ali<sup>a</sup>, Syed Hassan Abbas Jaffery<sup>a</sup>, Sikandar Aftab<sup>c</sup>, Sohail Abbas<sup>d</sup>, Muhammad Riaz<sup>a</sup>, **Thi Phuong Anh Bach**<sup>a</sup>, Muhammad Raza<sup>e</sup>, Javed Iqbal<sup>e</sup>, Sajjad Hussain<sup>a</sup>, **Zdenek Sofer**<sup>b</sup> & Jongwan Jung<sup>a\*</sup>

<sup>a</sup> Department of Nanotechnology and Advanced Materials Engineering, and HMC, Sejong University, 05006, Republic of Korea.

<sup>b</sup> Department of *Inorganic Chemistry, University of Chemistry and Technology Prague, Technická 5, 166 28 Paague 6, Czech Republic.*

<sup>c</sup> Department of Intelligent Mechatronics Engineering, Sejong University, Seoul, Republic of Korea.

<sup>d</sup> Department of Electrical Engineering Riphah International University, Islamabad Pakistan.

<sup>e</sup> Department of Physics, Karakoram International University, Gilgit, Pakistan.

\*Corresponding author: jwjung@sejong.ac.kr

## Supporting Information

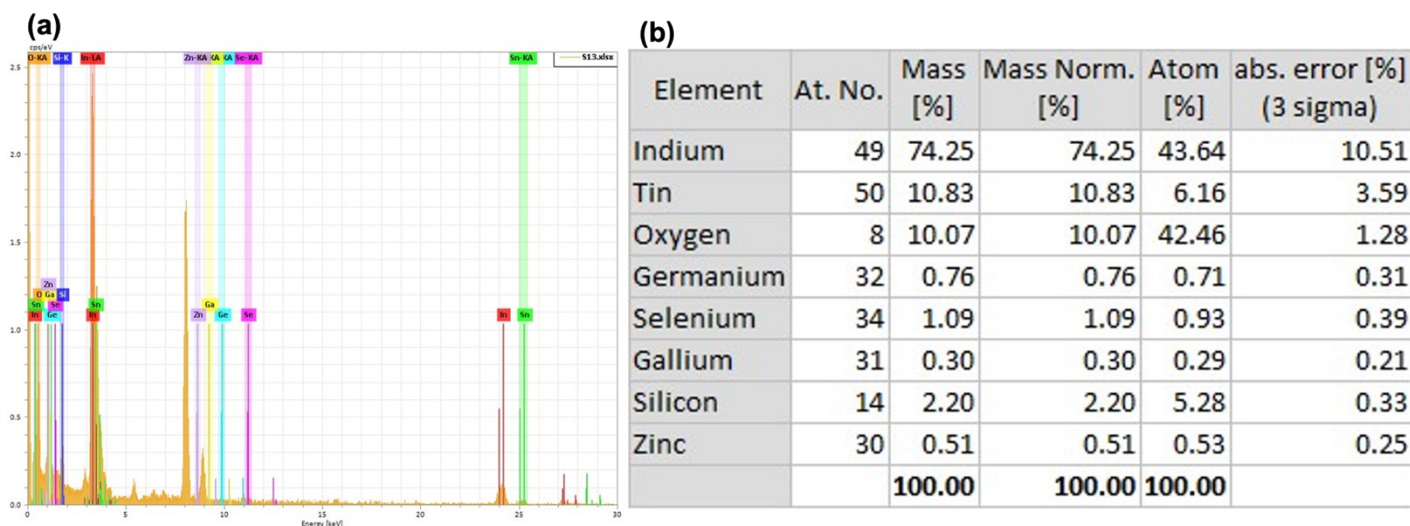

**Figure S1.** (a-h) EDS spectrum analysis of the elements **In, Sn, O, Ge, Ga, Si** and **Zn** validates the evidence of IGZO and GeSe film on ITO substrate.

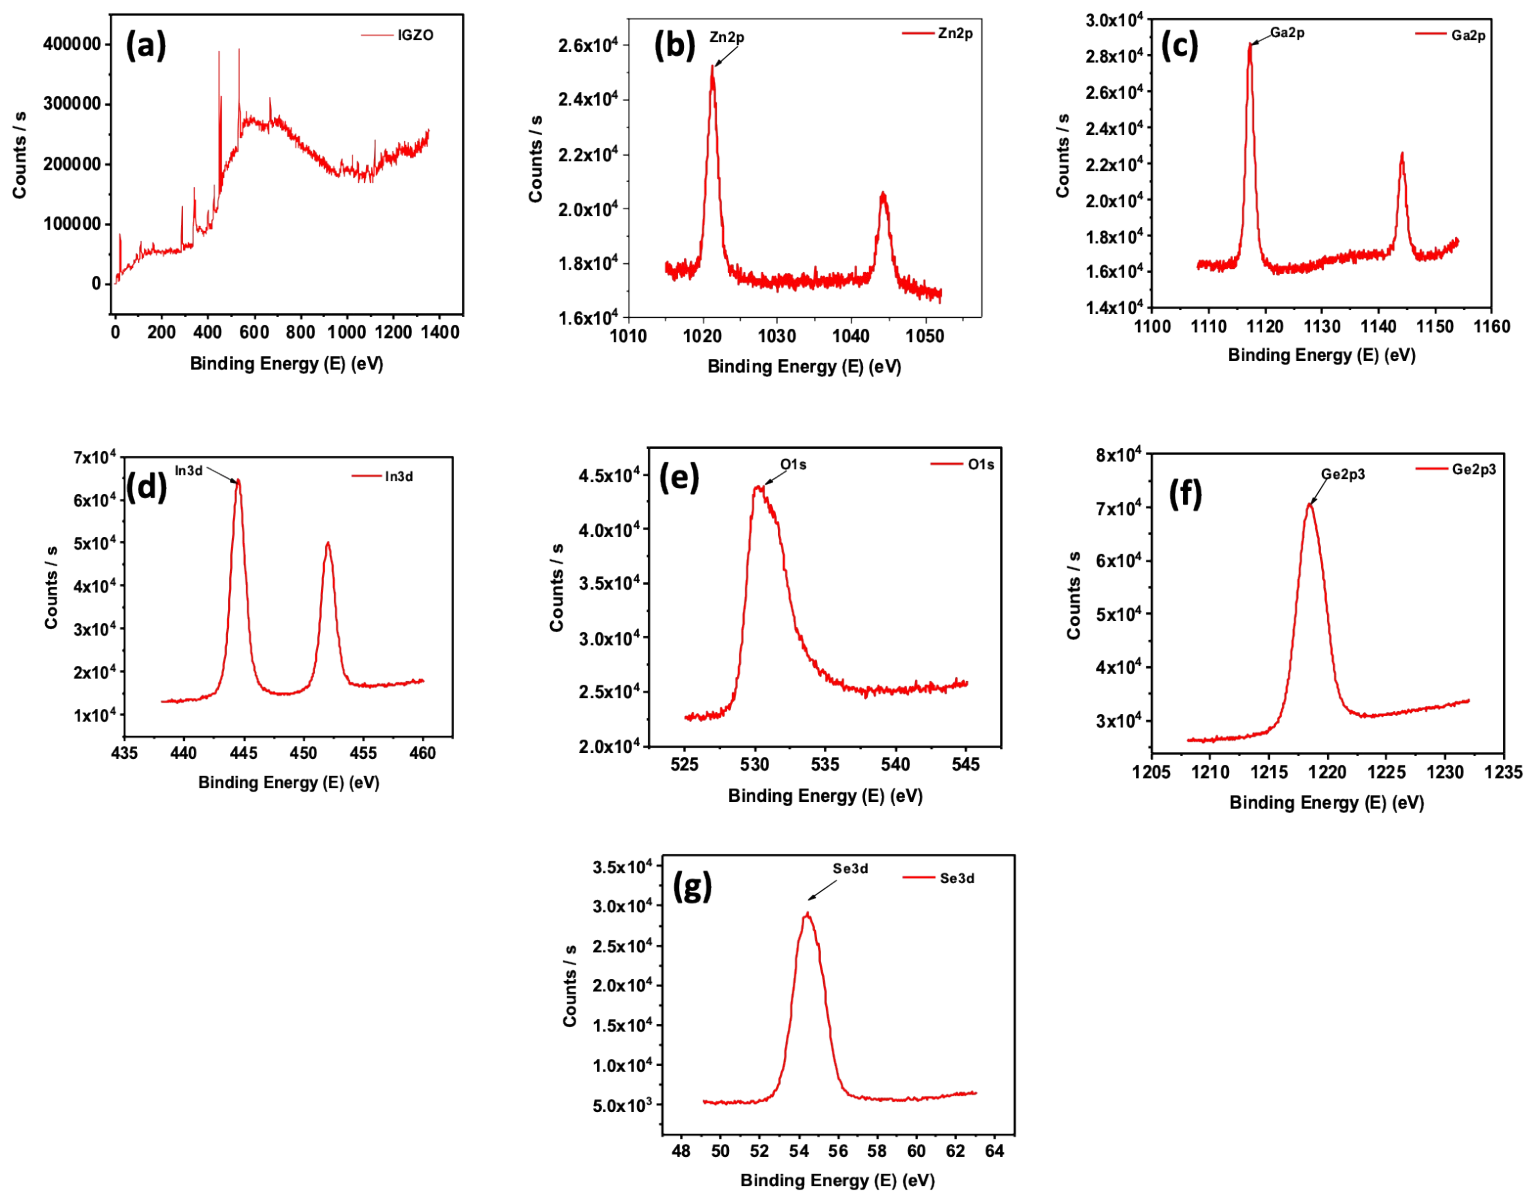

**Figure S2.** (a-h) X ray photoelectron spectroscopy (XPS; PHI 5000 Versa Probe) under Al K $\alpha$  at 25 W and  $6.7 \times 10^{-8}$  Pa to confirm the chemical composition and binding energy.

Table 1. Performance parameters comparison of IGZO/GeSe heterostructure device.

| No | Device configuration           | Responsivity (A/W) | Detectivity (Jones)    | Rise time (ms) | Fall time (ms) | Bias voltage (V) | Ref.      |
|----|--------------------------------|--------------------|------------------------|----------------|----------------|------------------|-----------|
| 1  | GeSe/MoS <sub>2</sub>          | 0.105              | 1.03x10 <sup>10</sup>  | 110            | 750            | 0                | 1         |
| 2  | Metal/GeSe                     | 0.28               | 4.1 × 10 <sup>9</sup>  | 69             | 92             | 0                | 2         |
| 3  | GeSe/MoSe <sub>2</sub>         | 0.465              | 7.3 × 10 <sup>9</sup>  | 180            | 360            | 0                | 3         |
| 4  | PtSe <sub>2</sub> /BN/Graphene | 1.4879             | 2.0 × 10 <sup>9</sup>  | 31             | 33             | 2                | 4         |
| 5  | GeSe/WS <sub>2</sub>           | 0.85               | 3.28 × 10 <sup>8</sup> | 10             | 14             | 0                | 5         |
| 6  | IGZO/GeSe                      | 0.538              | 8.4 × 10 <sup>9</sup>  | 25             | 25             | 0                | This work |

1. Y. Xin, X. Wang, Z. Chen, D. Weller, Y. Wang, L. Shi, X. Ma, C. Ding, W. Li, S. Guo and R. Liu, *ACS Applied Materials & Interfaces*, 2020, **12**, 15406-15413.
2. M. Hussain, S. Aftab, S. H. A. Jaffery, A. Ali, S. Hussain, D. N. Cong, R. Akhtar, Y. Seo, J. Eom, P. Gautam, H. Noh and J. Jung, *Scientific Reports*, 2020, **10**, 9374.
3. M. Hussain, S. H. A. Jaffery, A. Ali, C. D. Nguyen, S. Aftab, M. Riaz, S. Abbas, S. Hussain, Y. Seo and J. Jung, *Scientific Reports*, 2021, **11**, 3688.
4. S. Aftab, M. Samiya, H. M. U. Haq, M. W. Iqbal, M. Hussain, S. Yousuf, A. U. Rehman, M. U. Khan, Z. Ahmed and M. Z. Iqbal, *Journal of Materials Chemistry C*, 2021, **9**, 199-207.
5. S. H. A. Jaffery, J. Kim, G. Dastgeer, M. Hussain, A. Ali, S. Hussain, J. Eom, S. Hong and J. Jung, *Advanced Materials Interfaces*, 2020, **7**, 2000893.
